# Supplementary material for: Integrated functional genomic analysis identifies regulatory variants underlying a major QTL for disease resistance in European sea bass
Source: Springer Nature journal article supplement (doi:10.1186/s12915-025-02180-4), 2025-03-11
Supplement: MOESM1 [file 12915_2025_2180_MOESM1_ESM.pdf]

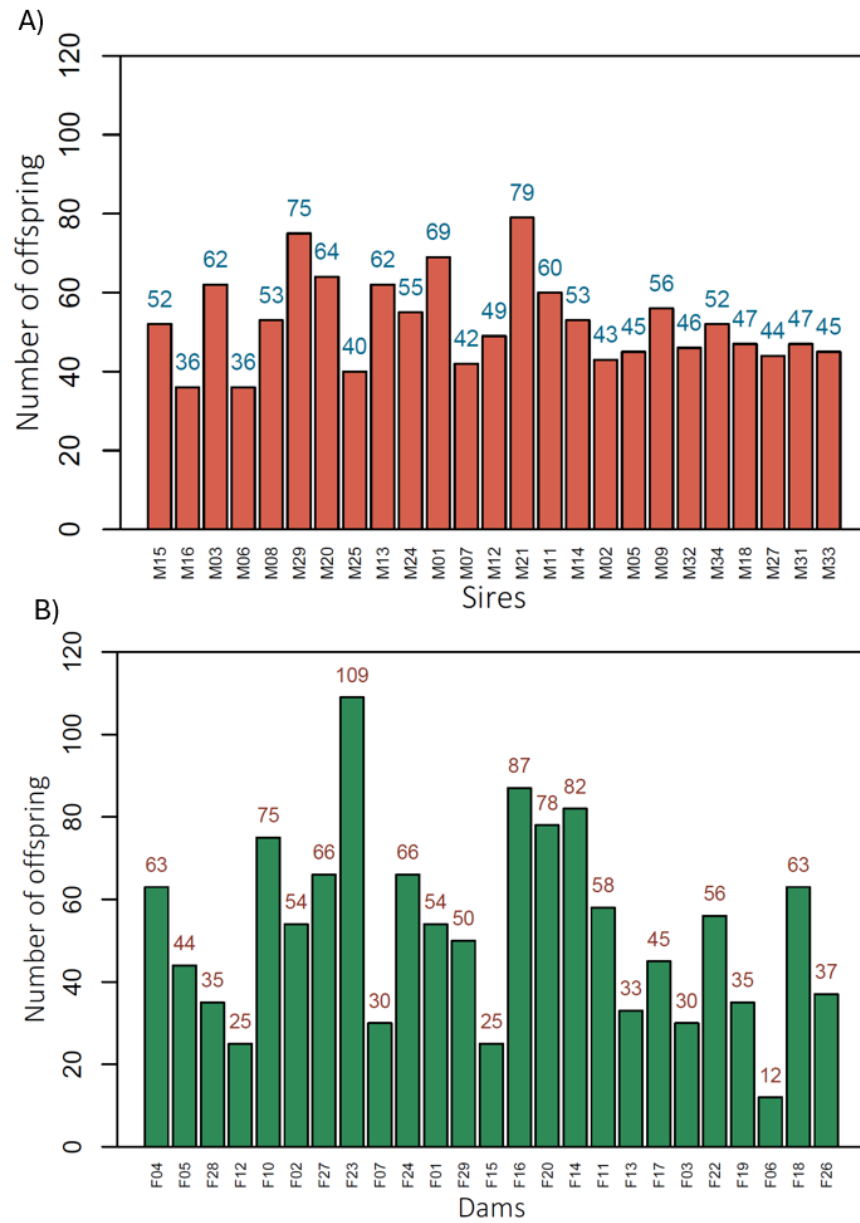

**Figure S1:** Barplot showing offspring contribution to the study population by the parents used in the current study, A) Sires and B) Dams.

**Table S1: Wild populations allelic frequencies of 4 of the variants associated with VNN resistance located in the 3'UTR region of the *ENSDLAG00005026832 (IFI27L2A)* gene.**

| <i>Variant</i> | <i>Allele</i>              |                              | <i>ATL</i> |            | <i>WMED</i> |            | <i>EMED</i> |            |
|----------------|----------------------------|------------------------------|------------|------------|-------------|------------|-------------|------------|
|                | <i>Reference<br/>(Ref)</i> | <i>Alternative<br/>(Alt)</i> | <i>Ref</i> | <i>Alt</i> | <i>Ref</i>  | <i>Alt</i> | <i>Ref</i>  | <i>Alt</i> |
| CHR3:10081901  | T                          | G                            | 0.85       | 0.15       | 0.87        | 0.13       | 0.25        | 0.75       |
| CHR3:10081923  | C                          | T                            | 0.92       | 0.08       | 0.95        | 0.05       | 0.27        | 0.73       |
| CHR3:10082148  | C                          | T                            | 0.77       | 0.23       | 0.75        | 0.25       | 0.18        | 0.82       |
| CHR3:10082380  | T                          | C                            | 0.65       | 0.35       | 0.80        | 0.20       | 0.18        | 0.82       |

Alternative allele – VNN resistance allele, Reference allele – susceptible allele, ATL – Atlantic population (susceptible), WMED – West Mediterranean population (susceptible), EMED – East Mediterranean population (resistant).

VARIANT: CHR3:10077301

CCTGGTGAGTACCACTGTTACTTTGACAATT>CCTGGTGAGTACCACTATTACTTTGACAATT

| TFBS  | ModelID    | Database                | WT score | MT score | WT strand | MT strand | Prediction | Score  |
|-------|------------|-------------------------|----------|----------|-----------|-----------|------------|--------|
| KLF15 | TFFM0942.1 | jaspar2022DetailedTFFMs | 0.0225   | 0.6857   | minus     | plus      | gain       | 0.8039 |

\*TFBS: Name of the transcription factor, ModelID: ID of the model in the source database, Database: Source database of the model, wt\_score, mt\_score: The highest score in the reference and mutated sequence, wt\_strand, mt\_strand: Strand of the location with the highest score in the reference and mutated sequence, Prediction: Prediction of a gain or loss of TFBS, or NA if not prediction was possible, Score: Score of prediction between -1 (likely TFBS loss) and +1 (likely TFBS gain)

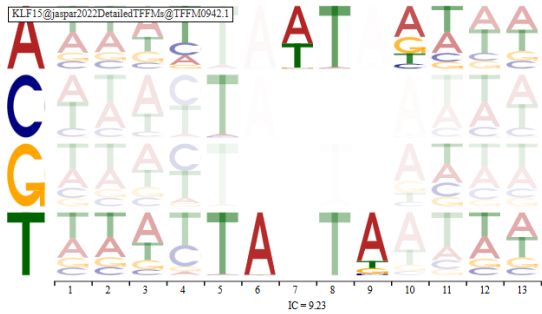

VARIANT: CHR3:10081209

CTGCAGGTTTCACCTCAGCTGGA GTAGCTGCAGGCTCCATT>CTGCAGGTTTCACCTCAGCTGGA ATAGCTGCAGGCTCCATT

| TFBS   | ModelID    | Database                | WT score | MT score | WT strand | MT strand | Prediction | Score  |
|--------|------------|-------------------------|----------|----------|-----------|-----------|------------|--------|
| TEAD4  | TFFM0110.1 | jaspar2022DetailedTFFMs | 0.0201   | 0.7912   | minus     | plus      | gain       | 0.9392 |
| ZNF140 | TFFM0634.1 | jaspar2022DetailedTFFMs | 0.0132   | 0.8483   | plus      | plus      | gain       | 0.9808 |

\*TFBS: Name of the transcription factor, ModelID: ID of the model in the source database, Database: Source database of the model, wt\_score, mt\_score: The highest score in the reference and mutated sequence, wt\_strand, mt\_strand: Strand of the location with the highest score in the reference and mutated sequence, Prediction: Prediction of a gain or loss of TFBS, or NA if not prediction was possible, Score: Score of prediction between -1 (likely TFBS loss) and +1 (likely TFBS gain)

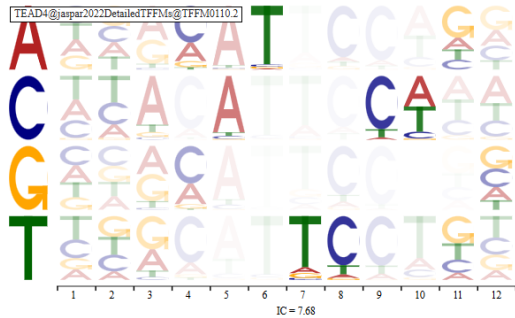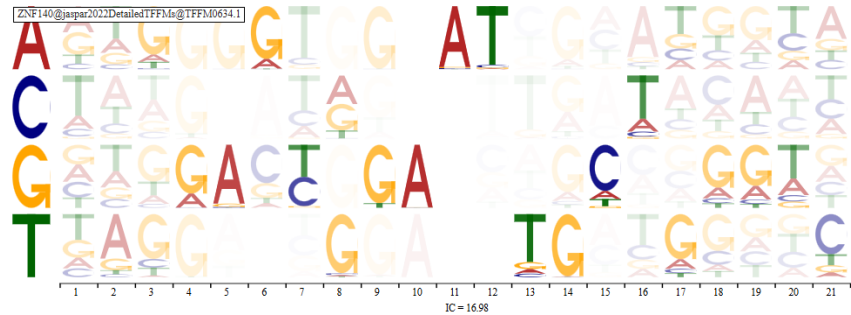

Figure S2: Predicted TFBS loss or gain effect results summary from FABIAn-variant of two putative causal variants (CHR3:10077301 and CHR3:10081209).
